# Supplementary material
Source: PubMed Central journal article supplement (PMC3983613)
Supplement: supp_blood-2013-10-534271_blood-2013-10-534271-1.pdf [file supp_blood-2013-10-534271_blood-2013-10-534271-1.pdf]

## Supplemental Materials and Methods

### Whole-exome capture and massively parallel sequencing

Purified tumor and germline genomic DNA from the discovery panel FR-CLL patients was enriched in protein coding sequences using the in-solution exome capture SureSelect Human All Exon 50Mb kit (Agilent Technologies). The latter encompasses all coding exons annotated by the GENCODE project, including all exons in the Consensus CDS (CCDS, March 2009) database, 10 bp of flanking sequence for each targeted region, and small noncoding RNAs from miRBase (v.13) and Rfam.

As quality controls for the pre-capture and post-capture steps, randomly selected PCR-amplified clones of the PCR products were subjected to Sanger sequencing to verify their preferential alignment to human genomic regions and to human coding transcripts (n = 50/library).

The performance of the sequencing was as follows: on average, ~104.1 million reads per case were mapped, at a mean depth of 81.5 (range, 38-112); 84% of the target sequence was covered by at least 30 reads (range, 68.6-88.6%). The comparison with data obtained by high-density SNP array analysis of the same tumor/normal pairs established the sensitivity of the method at 94% for heterozygous SNP calls.

### Validation of candidate somatic mutations by Sanger sequencing

The sequences surrounding the genomic locations of the candidate tumor-specific non-silent mutations were obtained from the UCSC Human Genome database, and PCR primers were derived from previously published studies<sup>18</sup> or were custom-designed using the Primer 3 online software (<http://frodo.wi.mit.edu/primer3/>) and the *in silico* PCR tool of the UCSC Human Genome database (<http://genome.ucsc.edu/>) to verify the uniqueness of the match. Primers sequences are available upon request.

To assess whether the mutations identified preferentially targeted specific dinucleotides, the expected frequencies were based on the dinucleotide sequence composition of the Consensus CDS, and statistical significance of differences in overrepresented changes was assessed by a Poisson distribution after correction for multiple hypotheses.

### *In silico* analysis of the mutated genes

The genes identified by WES in the discovery panel, were assigned to functional categories or annotated pathways by means of the “Functional Annotation cluster” of

DAVID software (<http://david.abcc.ncifcrf.gov/>).<sup>1</sup> This tool groups terms with similar annotations in clusters, and subsequently ranks them by Enrichment Score; clusters were then selected by retaining only the ones including at least one significant ( $p < 0.05$ ) term. The DAVID software was also used to run a “Functional Annotation chart” analysis based on KEGG, BIOCARTA, PANTHER, REACTOME and BBID pathways.

To the same purpose, the tools provided by the Molecular Signatures Database (Broad Institute, <http://www.broadinstitute.org/gsea/msigdb/index.jsp>), namely the “Compute overlap” and “Investigate Gene Sets” were applied.<sup>2</sup>

The consequences of somatic non-silent mutations were evaluated *in silico* by using the PolyPhen-2 (Polymorphism Phenotyping) algorithm (<http://genetics.bwh.harvard.edu/pph2/>), which predicts the possible effect of an aminoacid substitution on the structure and function of a human protein using physical and comparative considerations.

#### Screening of recurrently mutated genes

The sequences of the coding regions and splice sites of the recurrently mutated genes (*FAT1*, *UTRN*, *FPGT*, *TSC1*), required to have a Phred score  $\geq 20$ , were compared with the Reference sequence by the Mutation Surveyor Version 3.97 software (SoftGenetics) to identify candidate somatic mutations automatically and/or by manual curation. Synonymous mutations and variants reported as SNP (in NCBI dbSNP 137 and 1000 Genomes Project, <http://www.1000genomes.org/>) were filtered out. The remaining candidate somatic mutations were validated on high-molecular-weight genomic DNA from both tumor and normal (when available) samples by performing PCR amplification and bidirectional direct sequencing.

#### Copy number analysis by high-density SNP array

Data processing and identification of regions of abnormal copy number were performed according to a previously described workflow that implies the use of the dChipSNP software (<https://sites.google.com/site/dchipsoft/>) and a karyotype-guided normalization procedure).<sup>4</sup> For normalization purposes, matched normal DNA was simultaneously analyzed for the discovery panel patients; for samples belonging to the screening panel, the segmentation was computed against a diploid reference set of three normal DNA samples included in the same experiment as the tumor samples.

Visual inspection of the segments was performed by dChipSNP to exclude false calls due to experimental artifacts. Furthermore, to exclude calls of genomic gains or losses arising from inherited genomic CNVs in the unpaired samples, 130 normal DNAs from an independent study<sup>5</sup> were visualized simultaneously with the tumor samples. Alterations present in the pool of reference samples were presumed to be inherited and therefore eliminated. In addition, CNVs were excluded if the same regions were present in the Database of Genomic Variants (<http://dgvbeta.tcag.ca/dgv/app/home>).

Chromotripsis was suggested when at least 10 switches within the same chromosome were observed, in agreement with previously published papers.<sup>6,7</sup>

In order to identify CNAs that might have pathogenetic relevance, two approaches were used: i) identification of focal Minimal Common Regions (MCR) of aberration, ii) Genomic Identification of Significant Targets in Cancer (GISTIC) analysis.

The recognition of MCR was performed as follows: we first scanned through the curated segmented data across the affected samples to determine all consensus regions that are targeted by overlapping events of similar nature (gains and losses, separately) in  $\geq 2$  samples; we then refined the list of consensus regions by visual inspection using the Integrative Genomics Viewer (IGV) software (<http://www.broadinstitute.org/igv>) to retain only the core consensus regions. In particular, we focused on focal MCRs of gain or loss, which were defined according to the following criteria: i) the consensus interval across all affected tumors is smaller than 1Mb and/or encompasses 1-10 genes; and ii) in at least one of the affected sample, the aberrant segment encompasses 1-10 genes. MCRs encompassing  $\leq 10$  genes, but deriving from the overlap between large segments, and regions devoid of coding genes were not considered.

The second approach was represented by the GISTIC method, which was applied to the curated segmentation results as described by Beroukhi *et al.*<sup>8</sup>

GISTIC identifies significantly amplified or deleted regions of the genome across a set of samples taking into account its amplitude and the probability of detecting it by chance. Each significant region is represented by a peak and a q-value is assigned.

## References

1. Huang da W, Sherman BT, Lempicki RA. Systematic and integrative analysis of large gene lists using DAVID bioinformatics resources. *Nat Protoc.* 2009;4(1):44-57.

2. Subramanian A, Tamayo P, Mootha VK, *et al.* Gene set enrichment analysis: a knowledge-based approach for interpreting genome-wide expression profiles. *Proc Natl Acad Sci U S A.* 2005 Oct 25;102(43):15545-50.
3. Adzhubei IA, Schmidt S, Peshkin L, *et al.* A method and server for predicting damaging missense mutations. *Nat Methods.* 2010;7(4):248-9.
4. Pasqualucci L, Trifonov V, Fabbri G, *et al.* Analysis of the coding genome of diffuse large B-cell lymphoma. *Nat Genet.* 2011;43(9):830-7.
5. Mullighan CG, Goorha S, Radtke I, *et al.* Genome-wide analysis of genetic alterations in acute lymphoblastic leukaemia. *Nature.* 2007;446(7137):758-64.
6. Rausch T, Jones DT, Zapatka M, *et al.* Genome sequencing of pediatric medulloblastoma links catastrophic DNA rearrangements with TP53 mutations. *Cell.* 2012;148(1-2):59-71.
7. Edelmann J, Holzmann K, Miller F, *et al.* High-resolution genomic profiling of chronic lymphocytic leukemia reveals new recurrent genomic alterations. *Blood.* 2012;120(24):4783-94.
8. Beroukhi R, Getz G, Nghiemphu L, *et al.* Assessing the significance of chromosomal aberrations in cancer: methodology and application to glioma. *Proc Natl Acad Sci U S A.* 2007;104(50):20007-12.

**Table S1. Characteristics of the screening panel cases at refractoriness.**

| Sample ID | Timing of refractoriness | Gender | Age | Binet stage | Lymphocytes (x10 <sup>9</sup> /L) | CD5+/CD19+ (%) | IGHV        | IGHD    | IGHJ | IGHV homology | IGHV status | Cytogenetics                     | TP53 mutational status | NOTCH1 mutational status | BIRC3 mutational status | BIRC3 deletion by SNP or FISH | ZAP-70 <sup>^</sup> expression | CD38 <sup>^</sup> expression | SNP experiment |
|-----------|--------------------------|--------|-----|-------------|-----------------------------------|----------------|-------------|---------|------|---------------|-------------|----------------------------------|------------------------|--------------------------|-------------------------|-------------------------------|--------------------------------|------------------------------|----------------|
| 3878      | Primary                  | F      | 73  | A           | 11.5                              | 80             | 4-34*01     | 2-2*01  | 6*02 | 100.00        | UM          | +12, del13q14                    | WT                     | M                        | M                       | No                            | P                              | P                            | Yes            |
| 3981      | Acquired                 | M      | 75  | C           | 70.0                              | 85             | 3-21*01     | nd      | 6*02 | 95.83         | M           | del11q22-q23, del13q14           | WT                     | WT                       | WT                      | Yes                           | N                              | P                            | Yes            |
| 4047      | Acquired                 | M      | 79  | A           | 17.4                              | 85             | 1-2*04      | 2-2*01  | 6*03 | 100.00        | UM          | NA                               | WT                     | WT                       | WT                      | No                            | NA                             | P                            | Yes            |
| 4232      | Primary                  | M      | 52  | C           | 33.3                              | 80             | 1-69*01     | 3-3*01  | 6*03 | 100.00        | UM          | del17p13, del13q14               | M                      | WT                       | WT                      | No                            | N                              | N                            | Yes            |
| 4262      | Acquired                 | M      | 65  | C           | 100.0                             | 93             | 4-59*07     | 3-9*01  | 3*02 | 92.37         | M           | +12, del17p13, del13q14          | WT                     | WT                       | WT                      | No                            | N                              | P                            | Yes            |
| 4380      | Acquired                 | F      | 76  | C           | 21.0                              | 98             | 4-59*01     | nd      | 6*03 | 98.09         | UM          | +12, del17p13                    | WT                     | WT                       | WT                      | No                            | P                              | N                            | Yes            |
| 4845      | Primary                  | M      | 77  | A           | 19.5                              | 80             | 1-46*01     | 6-19*01 | 4*02 | 99.58         | UM          | del17p13, del13q14               | M                      | WT                       | WT                      | No                            | P                              | N                            | Yes            |
| 4885      | Acquired                 | M      | 93  | C           | 66.7                              | 89             | 1-2*04      | 3-3*01  | 6*02 | 100.00        | UM          | del11q22-q23, del13q14           | WT                     | WT                       | WT                      | Yes                           | P                              | N                            | Yes            |
| 5610      | Acquired                 | F      | 78  | C           | 19.5                              | 80             | 3-30*03     | 6-19*01 | 2*01 | 89.86         | M           | +12                              | WT                     | WT                       | M                       | No                            | N                              | P                            | Yes            |
| 5675      | Acquired                 | M      | 64  | C           | 16.0                              | 70             | 4-39*01     | 6-13*01 | 5*02 | 100.00        | UM          | +12, del17p13, del11q22-q23      | WT                     | M                        | WT                      | No                            | N                              | P                            | Yes            |
| 5977      | Acquired                 | F      | 78  | C           | 7.5                               | 90             | 1-69*01     | 3-3*01  | 6*02 | 100.00        | UM          | del11q22-q23                     | WT                     | WT                       | M                       | Yes                           | P                              | N                            | Yes            |
| 6012      | Primary                  | M      | 82  | B           | 13.7                              | 95             | 4-34*02     | 6-13*01 | 4*02 | 95.43         | M           | del17p13, del13q14               | M                      | WT                       | WT                      | No                            | N                              | N                            | Yes            |
| 6342      | Acquired                 | F      | 82  | C           | 20.2                              | 90             | 4-34*01     | 3-3*01  | 4*02 | 88.26         | M           | del13q14                         | M                      | WT                       | WT                      | No                            | P                              | N                            | Yes            |
| 6496      | Acquired                 | M      | 80  | B           | 30.8                              | 90             | 4-39*01     | 6-13*01 | 5*02 | 100.00        | M           | +12                              | WT                     | M                        | M                       | No                            | NA                             | P                            | Yes            |
| 6550      | Acquired                 | M      | 59  | C           | 23.0                              | 70             | 5-51*01     | 3-22*01 | 4*02 | 100.00        | UM          | del11q22-q23, del13q14           | WT                     | WT                       | M                       | Yes                           | N                              | P                            | Yes            |
| 6944      | Primary                  | M      | 59  | A           | 80                                | 94             | 4-61*01     | 2-2*02  | 6*02 | 88.6          | M           | del17p13, del11q22-q23           | M                      | WT                       | WT                      | No                            | N                              | N                            | Yes            |
| 7228      | Primary                  | F      | 83  | C           | 435.0                             | 90             | 4-4*02      | 2-2*01  | 5*02 | 100.00        | UM          | Normal                           | WT                     | WT                       | WT                      | No                            | N                              | P                            | Yes            |
| 7425      | Primary                  | M      | 70  | B           | 21.9                              | 90             | 4-34*01     | 3-10*01 | 3*01 | 89.47         | M           | del11q22-q23, del13q14           | WT                     | WT                       | WT                      | Yes                           | NA                             | N                            | No             |
| 7916      | Primary                  | M      | 79  | C           | 51.0                              | 94             | 4-30-4*01   | 3-22*01 | 5*02 | 100.00        | UM          | del17p13                         | M                      | WT                       | WT                      | No                            | P                              | N                            | Yes            |
| 8081      | Acquired                 | M      | 82  | C           | 15.0                              | 80             | 4-59*01     | 6-13*01 | 4*02 | 97.18         | M           | del13q14                         | WT                     | WT                       | WT                      | Yes                           | NA                             | P                            | Yes            |
| 8253      | Primary                  | M      | 71  | C           | 36                                | NA             | 2-05*01     | 2-2*02  | 6*02 | 100           | UM          | +12, del13q14                    | WT                     | WT                       | WT                      | No                            | P                              | NA                           | Yes            |
| 9244      | Acquired                 | M      | 69  | B           | 112.0                             | 90             | 3-23*01     | 6-13*01 | 4*02 | 87.28         | M           | +12, del11q22-q23, del13q14      | WT                     | WT                       | WT                      | Yes                           | N                              | N                            | Yes            |
| 9303      | Acquired                 | F      | 69  | B           | 31.7                              | 82             | 1-69*01     | 6-19*01 | 4*02 | 99.21         | UM          | +12                              | WT                     | M                        | WT                      | No                            | P                              | N                            | Yes            |
| 9311      | Acquired                 | F      | 84  | C           | 168.0                             | 90             | 1-69*01     | 2-15*01 | 6*02 | 99.65         | UM          | del17p13                         | M                      | WT                       | WT                      | No                            | P                              | P                            | Yes            |
| 9930      | Primary                  | F      | 60  | C           | 26.0                              | 92             | 4-39*01     | 4-4*01  | 6*02 | 100.00        | UM          | +12, del17p13                    | M                      | M                        | WT                      | No                            | P                              | N                            | Yes            |
| 10320     | Primary                  | F      | 78  | C           | 40.7                              | 88             | 2-5*10      | 3-3*01  | 6*03 | 99.51         | UM          | del13q14                         | WT                     | M                        | WT                      | No                            | P                              | P                            | Yes            |
| 10649     | Primary                  | M      | 55  | C           | 50.0                              | 70             | 1-69*13     | 2-15*01 | 6*02 | 100.00        | UM          | del11q22-q23, del13q14           | WT                     | WT                       | WT                      | Yes                           | N                              | N                            | Yes            |
| 11203     | Primary                  | M      | 73  | A           | 43.6                              | 91             | 3-64*05     | 3-3*01  | 4*02 | 100.00        | UM          | +12                              | WT                     | WT                       | WT                      | No                            | NA                             | N                            | Yes            |
| 12477     | Acquired                 | F      | 75  | C           | 48.5                              | 96             | 3-74*01     | 3-3*01  | 6*02 | 100.00        | UM          | +12                              | WT                     | M                        | WT                      | No                            | P                              | N                            | Yes            |
| 12521     | Primary                  | F      | 53  | C           | NA                                | 88             | 1-3*01      | 6-19*01 | 4*02 | 99.65         | UM          | +12, del17p13                    | M                      | WT                       | WT                      | NA                            | P                              | N                            | No             |
| 12525     | Primary                  | M      | 58  | B           | NA                                | 76             | 1-2*02      | 3-3*01  | 4*02 | 100.00        | UM          | del17p13, del13q14               | M                      | M                        | WT                      | NA                            | P                              | N                            | No             |
| 12530     | Primary                  | M      | 65  | A           | NA                                | 93             | 1-46*01, or | 6-6*01  | 6*02 | 100.00        | UM          | Normal                           | WT                     | M                        | WT                      | No                            | P                              | P                            | No             |
| 12534     | Primary                  | F      | 64  | B           | NA                                | 75             | 1-2*04      | 5-5*01  | 6*02 | 100.00        | UM          | del13q14                         | WT                     | M                        | M                       | No                            | N                              | P                            | No             |
| 12535     | Primary                  | M      | 49  | B           | NA                                | 90             | 3-21*01     | 3-9*01  | 4*02 | 99.65         | UM          | del17p13                         | WT                     | WT                       | WT                      | No                            | P                              | P                            | No             |
| 12539     | Acquired                 | M      | 72  | B           | NA                                | 90             | 1-2*02      | 1-26*01 | 6*02 | 99.65         | UM          | del11q22-q23, del13q14           | WT                     | WT                       | WT                      | Yes                           | N                              | P                            | No             |
| 12542     | Primary                  | M      | 85  | B           | NA                                | 77             | 1-69*01     | 2-2*01  | 6*02 | 100.00        | UM          | del11q22-q23, del13q14           | WT                     | WT                       | M                       | NA                            | P                              | N                            | No             |
| 12547     | Primary                  | M      | 68  | B           | NA                                | 83             | 1-69*02     | 3-3*01  | 4*02 | 100.00        | UM          | +12, del13q14                    | WT                     | WT                       | WT                      | No                            | N                              | P                            | No             |
| 12557     | Primary                  | M      | 63  | B           | NA                                | 85             | 5-a*03      | 6-19*01 | 4*02 | 100.00        | UM          | del13q14                         | WT                     | WT                       | WT                      | NA                            | P                              | P                            | No             |
| 12562     | Acquired                 | F      | 64  | C           | NA                                | 80             | 3-74*01     | 2-2*01  | 4*02 | 98.61         | UM          | del11q22-q23                     | WT                     | WT                       | WT                      | Yes                           | P                              | P                            | No             |
| 12568     | Primary                  | F      | 81  | C           | NA                                | 80             | 3-23*01     | 3-10*01 | 4*02 | 98.96         | UM          | del13q14                         | M                      | M                        | M                       | No                            | P                              | P                            | No             |
| 12570     | Primary                  | M      | 66  | C           | NA                                | 90             | NA          | NA      | NA   | NA            | NA          | del13q14                         | WT                     | WT                       | WT                      | NA                            | P                              | N                            | No             |
| 12571     | Acquired                 | M      | 83  | A           | NA                                | 75             | 4-34*01     | 3-3*01  | 6*04 | 100.00        | UM          | +12                              | WT                     | WT                       | WT                      | No                            | P                              | P                            | No             |
| 12627     | Acquired                 | M      | 73  | A           | NA                                | NA             | 4-04        | 3-03    | 6c   | 100.00        | UM          | NA                               | WT                     | WT                       | WT                      | NA                            | NA                             | N                            | No             |
| 12628     | Acquired                 | F      | 68  | C           | 211.7                             | 97             | 1-69        | 3-22    | 4b   | 100.00        | UM          | del17p13, del13q14               | WT                     | WT                       | WT                      | NA                            | P                              | N                            | No             |
| 12631     | Acquired                 | M      | 61  | C           | 15.1                              | NA             | 1-69        | 3-10    | 6b   | 100.00        | UM          | Normal                           | WT                     | WT                       | WT                      | NA                            | P                              | P                            | No             |
| 12632     | Acquired                 | M      | 73  | NA          | 30.0                              | 76             | 3-20        | 7-27    | 4b   | 98.60         | UM          | del13q14                         | WT                     | WT                       | M                       | NA                            | P                              | P                            | No             |
| 13931     | Acquired                 | M      | 78  | C           | 21.6                              | 90             | 3-30*01     | 3-22*01 | 4*02 | 100.00        | UM          | del17p13, del11q22-q23, del13q14 | M                      | M                        | WT                      | No                            | P                              | P                            | Yes            |
| FR-CLL_11 | Acquired                 | M      | 45  | B           | 42.0                              | 93             | 4-31*03     | 3-10*01 | 4*02 | 100.0         | UM          | del11q22-q23, del13q14           | WT                     | WT                       | WT                      | NA                            | N                              | P                            | No             |

<sup>^</sup>Considered positive if the percentage of positive leukemic cells was >20% by FACS analysis

<sup>^^</sup>Considered positive if the percentage of positive leukemic cells was >30%

Abbreviations. NA, not available.

**Table S2. Characteristics of the unselected CLL at diagnosis series.**

| Characteristics <sup>a</sup>                 | All<br>(n=174) |      |
|----------------------------------------------|----------------|------|
|                                              | n              | %    |
| Age >70 years                                | 91             | 52.3 |
| Male                                         | 99             | 56.9 |
| Binet A                                      | 130            | 74.7 |
| Binet B                                      | 23             | 13.2 |
| Binet C                                      | 21             | 12.1 |
| <i>IGHV</i> identity $\geq$ 98% <sup>b</sup> | 64             | 37.0 |
| 13q14 deletion                               | 95             | 54.6 |
| Trisomy 12                                   | 41             | 23.6 |
| 11q22-q23 deletion                           | 15             | 8.6  |
| 17p13 deletion                               | 20             | 11.5 |
| <i>TP53</i> mutations                        | 18             | 10.3 |
| <i>TP53</i> lesions <sup>c</sup>             | 24             | 13.8 |
| <i>NOTCH1</i> mutation                       | 22             | 12.6 |
| <i>SF3B1</i> mutation                        | 12             | 6.9  |
| <i>BIRC3</i> deletion                        | 6              | 3.4  |
| <i>BIRC3</i> mutation                        | 4              | 2.3  |
| <i>BIRC3</i> disruption                      | 8              | 4.6  |
| <i>MYD88</i> mutation                        | 7              | 4.0  |

<sup>a</sup> *IGHV*, immunoglobulin heavy variable gene

<sup>b</sup> *IGHV* mutation status was assessable in 173 patients; 1 patient lacked productive *IGHV-IGHD-IGHJ* rearrangements

<sup>c</sup> Clonal *TP53* mutations and/or 17p13 deletion

**Table S3. Illumina sequencing summary.**

| Sample ID  | Target Region Coverage (%) |      | Mean Depth <sup>^</sup> | N of mapped reads (%) | % of SNP detection |
|------------|----------------------------|------|-------------------------|-----------------------|--------------------|
|            | ≥10X                       | ≥30X |                         |                       |                    |
| FR-CLL_1T  | 93.1                       | 84.2 | 71.5                    | 90318158 (98.3)       | 95.8               |
| FR-CLL_1N  | 93.1                       | 83.6 | 67.5                    | 84859696 (98.4)       | 94.5               |
| FR-CLL_2T  | 93.5                       | 84.8 | 75.5                    | 97120344 (98.2)       | 94.8               |
| FR-CLL_2N  | 92.6                       | 81.3 | 60.2                    | 78584417 (98.2)       | 94.8               |
| FR-CLL_3T  | 93.7                       | 86.0 | 88.6                    | 114597200 (97.8)      | 94.6               |
| FR-CLL_3N  | 93.6                       | 85.5 | 86.5                    | 107516681 (97.6)      | 95.3               |
| FR-CLL_4T  | 89.3                       | 68.6 | 38.6                    | 49349074 (97.1)       | 93.9               |
| FR-CLL_4N  | 94.3                       | 87.1 | 92.5                    | 119892880 (96.7)      | 95.2               |
| FR-CLL_5T  | 93.8                       | 86.2 | 89.8                    | 115021059 (98)        | 95.7               |
| FR-CLL_5N  | 93.3                       | 84.7 | 79.4                    | 101185263 (98)        | 95.3               |
| FR-CLL_6T  | 91.5                       | 79.4 | 58.7                    | 74517848 (98.1)       | 94.0               |
| FR-CLL_6N  | 95.0                       | 88.6 | 112.4                   | 142049821 (97.8)      | 94.8               |
| FR-CLL_7T  | 93.3                       | 84.5 | 76.9                    | 99151994 (97.9)       | 93.3               |
| FR-CLL_7N  | 94.2                       | 86.2 | 82.7                    | 107175995 (97.6)      | 94.6               |
| FR-CLL_8T  | 91.8                       | 83.0 | 88.4                    | 109547573 (96.8)      | 92.8               |
| FR-CLL_8N  | 94.4                       | 87.5 | 102.7                   | 128926720 (96.4)      | 94.8               |
| FR-CLL_9T  | 93.8                       | 86.7 | 104.2                   | 134109285 (96.9)      | 93.9               |
| FR-CLL_9N  | 93.5                       | 85.6 | 85.2                    | 106582658 (96.5)      | 93.7               |
| FR-CLL_10T | 93.8                       | 86.4 | 95.9                    | 126789600 (97.1)      | 89.2               |
| FR-CLL_10N | 93.1                       | 83.9 | 72.9                    | 94721988 (96.6)       | 94.1               |

<sup>^</sup>Mean number of sequence reads covering the target exome

**Table S4. Validated somatic mutations identified by whole exome sequencing in the FR-CLL discovery panel.**

| Sample ID | Gene                 | Exon <sup>Δ</sup> | Chr | Start <sup>ΔΔ</sup> | End <sup>ΔΔ</sup> | Ref nt | Var nt | T frequency | T total depth | N total depth | Mutation Type     | AA change                  | PolyPhen-2 prediction (probability) | COSMIC total alterations | CGC database* | CCDS ID                                         |
|-----------|----------------------|-------------------|-----|---------------------|-------------------|--------|--------|-------------|---------------|---------------|-------------------|----------------------------|-------------------------------------|--------------------------|---------------|-------------------------------------------------|
| FR-CLL_1  | ABCC9 <sup>†</sup>   | 4                 | 12  | 22069925            | 22069925          | C      | T      | 16          | 394           | 373           | Missense          | M173I                      | neutral (0.045)                     | 6                        | No            | CCDS8693.1,CCDS8694.1                           |
| FR-CLL_1  | ATM                  | 31                | 11  | 108165701           | 108165701         | G      | -      | 25          | 112           | 100           | Frameshift del    | L1608fs                    | nd                                  | 240                      | No            | CCDS31669.1                                     |
| FR-CLL_1  | BACE2                | 8,9,8             | 21  | 42647351            | 42647351          | G      | A      | 46          | 84            | 90            | Missense          | M396I,V453I,V403I          | neutral (0)                         | 2                        | No            | CCDS13670.1,CCDS13668.1,CCDS13669.1             |
| FR-CLL_1  | CNTF                 | 2                 | 11  | 58391620            | 58391620          | C      | A      | 19          | 100           | 99            | Missense          | N76K                       | deleterious (0.914)                 | 1                        | No            | CCDS31554.1                                     |
| FR-CLL_1  | ELF4                 | 2                 | X   | 129208703           | 129208703         | C      | A      | 21          | 98            | 94            | Missense          | A34S                       | deleterious (0.993)                 | 1                        | Yes           | CCDS14617.1                                     |
| FR-CLL_1  | FAT1                 | 5                 | 4   | 187557371           | 187557371         | C      | T      | 11          | 199           | 184           | Missense          | G1331S                     | deleterious (1)                     | 12                       | No            | CCDS47177.1                                     |
| FR-CLL_1  | FPGT-TNNI3K,TNNI3K   | 4,2               | 1   | 74701801            | 74701801          | A      | T      | 18          | 94            | 85            | Missense          | K120I,K19I                 | deleterious (0.651)                 | 10                       | No            | CCDS44161.1,CCDS664.1                           |
| FR-CLL_1  | LARS                 | 25                | 5   | 145509655           | 145509655         | T      | C      | 18          | 107           | 99            | Missense          | I852V                      | neutral (0.09)                      | 0                        | No            | CCDS34265.1                                     |
| FR-CLL_1  | MUC5B                | 32                | 11  | 1273599             | 1273599           | C      | T      | 16          | 128           | 123           | Nonsense          | R4967*                     | nd                                  | 0                        | No            | CCDS44515.1                                     |
| FR-CLL_1  | MYO1B                | 19                | 2   | 192257876           | 192257876         | G      | A      | 40          | 77            | 83            | Nonsense          | W718*                      | nd                                  | 8                        | No            | CCDS46477.1,CCDS2311.1                          |
| FR-CLL_1  | PDE7B                | 12                | 6   | 136508176           | 136508176         | G      | A      | 47          | 117           | 99            | Missense          | E350K                      | neutral (0.025)                     | 1                        | No            | CCDS5175.1                                      |
| FR-CLL_1  | PPEF1 <sup>†</sup>   | 14,13             | X   | 18842130            | 18842130          | A      | G      | 17          | 193           | 171           | Missense          | N531D,N469D                | neutral (0.129)                     | 0                        | No            | CCDS14188.1,CCDS43920.1                         |
| FR-CLL_1  | PTCHD1               | 3                 | X   | 23412261            | 23412261          | A      | T      | 14          | 167           | 155           | Missense          | I876F                      | neutral (0)                         | 6                        | No            | CCDS35215.2                                     |
| FR-CLL_1  | RGS4                 | 4,6,4,5           | 1   | 163044131           | 163044131         | C      | A      | 19          | 296           | 304           | Missense          | Q78K,T230T,T115T,T133T     | unknown                             | 3                        | No            | CCDS44271.1,CCDS44270.1,CCDS44272.1,CCDS1243.1  |
| FR-CLL_1  | SF3B1                | 14                | 2   | 198267361           | 198267361         | T      | C      | 25          | 114           | 123           | Missense          | K666E                      | deleterious (0.995)                 | 6                        | No            | CCDS3356.1                                      |
| FR-CLL_1  | SLC9A4               |                   | 2   | 103120167           | 103120167         | G      | A      | 21          | 118           | 106           | Splice site       |                            | nd                                  | 3                        | No            | CCDS33264.1                                     |
| FR-CLL_1  | SPATA19              | 3                 | 11  | 133714475           | 133714475         | C      | T      | 25          | 103           | 139           | Missense          | G66S                       | neutral (0.006)                     | 0                        | No            | CCDS8493.1                                      |
| FR-CLL_2  | ABCA4                | 31                | 1   | 94490595            | 94490595          | G      | A      | 52          | 71            | 50            | Missense          | R1517C                     | deleterious (0.957)                 | 12                       | No            | CCDS747.1                                       |
| FR-CLL_2  | AMOTL1               | 8                 | 11  | 94587204            | 94587204          | G      | A      | 49          | 162           | 109           | Missense          | R634Q                      | deleterious (0.999)                 | 2                        | No            | CCDS44712.1                                     |
| FR-CLL_2  | ARID5B               | 6                 | 10  | 63816919            | 63816919          | A      | C      | 46          | 111           | 82            | Missense          | N297T                      | deleterious (0.854)                 | 4                        | No            | CCDS31208.1                                     |
| FR-CLL_2  | CEACAM5 <sup>†</sup> | 2                 | 19  | 42213644            | 42213644          | C      | T      | 6           | 313           | 295           | Missense          | T37I                       | deleterious (0.998)                 | 2                        | No            | CCDS12584.1                                     |
| FR-CLL_2  | Cxor140B             | 2                 | X   | 149100913           | 149100913         | T      | G      | 78          | 103           | 100           | Missense          | N109T                      | neutral (0.001)                     | 0                        | No            | CCDS34526.1                                     |
| FR-CLL_2  | ENTPD4               | 3                 | 8   | 23305216            | 23305216          | G      | A      | 41          | 283           | 275           | Missense          | P130L                      | deleterious (0.994)                 | 2                        | No            | CCDS47827.1,CCDS6041.1                          |
| FR-CLL_2  | GRAMD1C              | 17                | 3   | 113659113           | 113659113         | C      | T      | 24          | 95            | 91            | Missense          | A610V                      | neutral (0)                         | 3                        | No            | CCDS33826.1                                     |
| FR-CLL_2  | IQCF1                | 4                 | 3   | 51929109            | 51929109          | G      | A      | 44          | 116           | 113           | Missense          | R139C                      | deleterious (1)                     | 1                        | No            | CCDS2836.1                                      |
| FR-CLL_2  | KLHL6                | 1                 | 3   | 183273248           | 183273248         | A      | G      | 43          | 151           | 121           | Missense          | L65P                       | deleterious (0.919)                 | 3                        | No            | CCDS3245.2                                      |
| FR-CLL_2  | MAGEA8               | 1                 | X   | 149013882           | 149013882         | G      | C      | 14          | 167           | 135           | Missense          | R279T                      | deleterious (0.992)                 | 0                        | No            | CCDS14692.1                                     |
| FR-CLL_2  | MED26                | 3                 | 19  | 16687433            | 16687433          | G      | A      | 48          | 54            | 38            | Missense          | T403M                      | deleterious (0.982)                 | 2                        | No            | CCDS12347.1                                     |
| FR-CLL_2  | OMG                  | 1                 | 17  | 29623256            | 29623256          | A      | G      | 22          | 127           | 96            | Missense          | C32R                       | deleterious (1)                     | 2                        | No            | CCDS11265.1                                     |
| FR-CLL_2  | S100A2               | 1                 | 1   | 153536274           | 153536274         | T      | G      | 39          | 84            | 67            | Missense          | K26T                       | deleterious (0.982)                 | 1                        | No            | CCDS1044.1                                      |
| FR-CLL_2  | SCGB1D4              | 2                 | 11  | 62065064            | 62065064          | G      | A      | 24          | 240           | 173           | Missense          | A41V                       | neutral (0.001)                     | 0                        | No            | CCDS31583.1                                     |
| FR-CLL_2  | SLC25A37             | 4                 | 8   | 23429040            | 23429040          | G      | A      | 32          | 94            | 90            | Missense          | R230Q                      | deleterious (1)                     | 0                        | No            | CCDS47828.1                                     |
| FR-CLL_2  | SPAG16               | 14                | 2   | 214972935           | 214972935         | T      | C      | 41          | 73            | 57            | Missense          | S515P                      | deleterious (0.774)                 | 2                        | No            | CCDS2396.1                                      |
| FR-CLL_2  | TSC1                 | 13                | 9   | 135780970           | 135780970         | G      | -      | 39          | 137           | 134           | Frameshift del    | N665fs                     | nd                                  | 14                       | Yes           | CCDS6956.1                                      |
| FR-CLL_2  | ZNF536               | 2                 | 19  | 31025826            | 31025826          | C      | T      | 21          | 158           | 132           | Missense          | S748L                      | neutral (0.302)                     | 11                       | No            | CCDS32984.1                                     |
| FR-CLL_3  | ABCA12               | 43,35             | 2   | 215820048           | 215820048         | G      | A      | 34          | 94            | 82            | Missense          | L2091F,L1773F              | neutral (0)                         | 11                       | No            | CCDS33372.1,CCDS33373.1                         |
| FR-CLL_3  | AHNAK2               | 7                 | 14  | 105414251           | 105414251         | C      | T      | 53          | 395           | 409           | Missense          | V2513M                     | neutral (0.417)                     | 1                        | No            | CCDS45177.1                                     |
| FR-CLL_3  | ANK1                 | 41,42,41,3        | 8   | 41519440            | 41519440          | C      | A      | 35          | 49            | 79            | Missense          | R1833L,R1874L,R1833L,R108L | deleterious (0.971)                 | 9                        | No            | CCDS6119.1,CCDS47849.1,CCDS6121.1,CCDS6122.1    |
| FR-CLL_3  | ATP12A               | 13                | 13  | 25274955            | 25274955          | C      | A      | 37          | 124           | 124           | Missense          | N592K                      | deleterious (0.999)                 | 6                        | No            | CCDS31948.1                                     |
| FR-CLL_3  | C10orf53             |                   | 10  | 50916667            | 50916667          | C      | T      | 49          | 162           | 150           | Splice site       |                            | nd                                  | 0                        | No            | CCDS31202.1                                     |
| FR-CLL_3  | CCR7                 | 3                 | 17  | 38711057            | 38711057          | A      | T      | 39          | 70            | 74            | Nonsense          | C358*                      | nd                                  | 1                        | No            | CCDS11369.1                                     |
| FR-CLL_3  | COL6A1               | 3                 | 21  | 47404310            | 47404310          | G      | A      | 48          | 44            | 37            | Missense          | A119T                      | neutral (0.074)                     | 1                        | No            | CCDS13727.1                                     |
| FR-CLL_3  | DSP                  | 23                | 6   | 7580154             | 7580154           | G      | C      | 44          | 196           | 189           | Missense          | R1244T                     | deleterious (0.824)                 | 9                        | No            | CCDS4501.1                                      |
| FR-CLL_3  | FPGT-TNNI3K,TNNI3K   | 11,9              | 1   | 74808793            | 74808793          | G      | A      | 42          | 88            | 73            | Missense          | E389K,E288K                | neutral (0.228)                     | 10                       | No            | CCDS44161.1,CCDS664.1                           |
| FR-CLL_3  | IKZF3                | 5                 | 17  | 37947776            | 37947776          | A      | C      | 42          | 187           | 249           | Missense          | L162R                      | deleterious (0.995)                 | 6                        | No            | CCDS11346.1,CCDS11348.1,CCDS11349.1,CCDS11351.1 |
| FR-CLL_3  | MPDZ                 | 1                 | 9   | 13250312            | 13250312          | C      | A      | 33          | 99            | 96            | Missense          | M1I                        | neutral (0.395)                     | 6                        | No            | CCDS47951.1                                     |
| FR-CLL_3  | ODZ3                 | 15                | 4   | 183652049           | 183652049         | T      | A      | 35          | 246           | 215           | Missense          | N908K                      | deleterious (0.818)                 | 0                        | No            | CCDS47165.1                                     |
| FR-CLL_3  | PDGFRA               | 9                 | 4   | 55139874            | 55139874          | G      | A      | 50          | 92            | 91            | Missense          | R512Q                      | deleterious (0.999)                 | 674                      | Yes           | CCDS3495.1                                      |
| FR-CLL_3  | PEX1                 | 16                | 7   | 92129115            | 92129115          | C      | A      | 49          | 91            | 109           | Missense          | R874I                      | deleterious (0.987)                 | 2                        | No            | CCDS5627.1                                      |
| FR-CLL_3  | PKHD1L1              | 69                | 8   | 110520004           | 110520004         | G      | A      | 40          | 415           | 441           | Missense          | A3703T                     | neutral (0.137)                     | 14                       | No            | CCDS47911.1                                     |
| FR-CLL_3  | PTPRU                |                   | 1   | 29642023            | 29642023          | C      | T      | 45          | 99            | 109           | Splice site       |                            | nd                                  | 7                        | No            | CCDS334.1,CCDS335.1,CCDS44098.1                 |
| FR-CLL_3  | SF3B1                | 15                | 2   | 198266832           | 198266832         | TTTCTG | -      | 37          | 126           | 162           | In frame deletion | DK700-Q699                 | nd                                  | 6                        | No            | CCDS3356.1                                      |
| FR-CLL_3  | TG                   | 37                | 8   | 134025965           | 134025965         | G      | A      | 56          | 72            | 84            | Missense          | R2173Q                     | neutral (0.001)                     | 15                       | No            | CCDS34944.1                                     |
| FR-CLL_3  | TP53                 | 6                 | 17  | 7577069             | 7577069           | G      | A      | 82          | 24            | 50            | Missense          | R290H                      | deleterious (1)                     | 22245                    | Yes           | CCDS45605.1,CCDS45606.1,CCDS11118.1             |
| FR-CLL_3  | XPO1                 | 14                | 2   | 61719472            | 61719472          | C      | T      | 50          | 88            | 76            | Missense          | E571K                      | deleterious (0.996)                 | 4                        | No            | CCDS33205.1                                     |
| FR-CLL_3  | ZBTB38               | 1                 | 3   | 141164202           | 141164202         | A      | C      | 37          | 75            | 65            | Missense          | K991T                      | neutral (0.127)                     | 3                        | No            | CCDS43157.1                                     |



|          |                     |          |    |           |           |     |    |    |     |     |                   |                      |                     |       |                                   |                                     |
|----------|---------------------|----------|----|-----------|-----------|-----|----|----|-----|-----|-------------------|----------------------|---------------------|-------|-----------------------------------|-------------------------------------|
| FR-CLL_3 | ZFH4                | 9        | 8  | 77768210  | 77768210  | C   | T  | 47 | 301 | 287 | Missense          | A2973V               | deleterious (0.651) | 15    | No                                | CCDS47878.1                         |
| FR-CLL_4 | ATF7                | 1        | 12 | 53994750  | 53994750  | G   | A  | 59 | 41  | 126 | Missense          | P12L                 | neutral (0.002)     | 2     | No                                | CCDS44905.1,CCDS44906.1,CCDS44907.1 |
| FR-CLL_4 | C12orf50            | 10       | 12 | 88379789  | 88379789  | G   | A  | 59 | 61  | 149 | Missense          | R322C                | neutral (0.001)     | 3     | No                                | CCDS9031.1                          |
| FR-CLL_4 | CYP8B1              | 1        | 3  | 42916567  | 42916569  | TCT | -  | 44 | 16  | 64  | In frame deletion | DK248                | nd                  | 2     | No                                | CCDS2707.1                          |
| FR-CLL_4 | ELAVL4              | 7        | 1  | 50666509  | 50666509  | G   | T  | 51 | 136 | 285 | Missense          | A268S                | neutral (0.001)     | 2     | No                                | CCDS553.1                           |
| FR-CLL_4 | FAM60A              | 3        | 12 | 31446745  | 31446745  | G   | T  | 62 | 26  | 69  | Missense          | R117S                | deleterious (0.806) | 0     | No                                | CCDS8723.1                          |
| FR-CLL_4 | HEXA                | 6        | 15 | 72643485  | 72643485  | G   | A  | 60 | 48  | 94  | Missense          | L221F                | deleterious (0.973) | 4     | No                                | CCDS10243.1                         |
| FR-CLL_4 | KRTAP8-1            | 1        | 21 | 32185527  | 32185527  | G   | T  | 69 | 54  | 125 | Missense          | D4E                  | neutral (0)         | 0     | No                                | CCDS13607.1                         |
| FR-CLL_4 | LAMA2               | 37       | 6  | 129714359 | 129714359 | C   | T  | 48 | 44  | 124 | Missense          | R1802C               | deleterious (0.942) | 10    | No                                | CCDS5138.1                          |
| FR-CLL_4 | MKNK2               | 5        | 19 | 2043553   | 2043553   | C   | T  | 46 | 28  | 75  | Missense          | R123Q                | deleterious (0.998) | 2     | No                                | CCDS12079.1,CCDS12080.1             |
| FR-CLL_4 | PNN                 | 9        | 14 | 39650571  | 39650571  | A   | C  | 47 | 114 | 237 | Missense          | K553T                | deleterious (0.948) | 1     | No                                | CCDS9671.1                          |
| FR-CLL_4 | SLCO1A2             | 7        | 12 | 21453377  | 21453377  | T   | G  | 64 | 42  | 109 | Missense          | K272T                | deleterious (0.984) | 4     | No                                | CCDS8686.1                          |
| FR-CLL_4 | SORL1               | 26       | 11 | 121454269 | 121454269 | C   | A  | 54 | 28  | 85  | Missense          | S1228Y               | deleterious (0.998) | 15    | No                                | CCDS8436.1                          |
| FR-CLL_4 | TP53                | 6        | 17 | 7577580   | 7577580   | T   | C  | 84 | 19  | 53  | Missense          | Y234C                | deleterious (1)     | 22245 | Yes                               | CCDS45605.1,CCDS45606.1,CCDS11118.1 |
| FR-CLL_5 | ADAMTS12            | 14       | 5  | 33624414  | 33624414  | C   | T  | 22 | 121 | 98  | Missense          | D689N                | deleterious (0.999) | 9     | No                                | CCDS34140.1                         |
| FR-CLL_5 | ADARB2              | 2        | 10 | 1421289   | 1421289   | G   | A  | 31 | 140 | 125 | Missense          | T56M                 | neutral (0.001)     | 3     | No                                | CCDS7058.1                          |
| FR-CLL_5 | ANO2                | 18       | 12 | 5724438   | 5724438   | A   | -  | 21 | 173 | 134 | Frameshift del    | F614fs               | nd                  | 7     | No                                | CCDS44807.1                         |
| FR-CLL_5 | CSMD3               | 42,41,42 | 8  | 113353899 | 113353899 | A   | T  | 26 | 65  | 78  | Missense          | F2153L,F2049L,F2113L | deleterious (0.999) | 63    | No                                | CCDS6315.1,CCDS6316.2,CCDS6317.1    |
| FR-CLL_5 | ELFN2               | 1        | 22 | 37770311  | 37770311  | G   | A  | 17 | 150 | 130 | Missense          | R422W                | deleterious (0.996) | 2     | No                                | CCDS33642.1                         |
| FR-CLL_5 | FBLN5               | 7        | 14 | 92353549  | 92353549  | C   | T  | 17 | 320 | 265 | Missense          | V243I                | neutral (0.025)     | 6     | No                                | CCDS9898.1                          |
| FR-CLL_5 | GFRAL               | 5        | 6  | 55216180  | 55216180  | G   | A  | 28 | 285 | 266 | Missense          | C167Y                | deleterious (1)     | 2     | No                                | CCDS4957.1                          |
| FR-CLL_5 | GP5 <sup>#</sup>    | 1        | 3  | 194118638 | 194118638 | T   | C  | 22 | 129 | 121 | Missense          | E125G                | deleterious (0.992) | 3     | No                                | CCDS3307.1                          |
| FR-CLL_5 | IQCA1               | 18       | 2  | 237240051 | 237240051 | G   | A  | 16 | 299 | 275 | Missense          | A775V                | neutral (0)         | 1     | No                                | CCDS46549.1                         |
| FR-CLL_5 | NPHP1               | 8        | 2  | 110922206 | 110922206 | C   | T  | 27 | 354 | 275 | Missense          | R277Q                | neutral (0)         | 2     | No                                | CCDS46385.1,CCDS2086.1              |
| FR-CLL_5 | NRP1                | 13       | 10 | 33481263  | 33481263  | G   | A  | 28 | 577 | 503 | Nonsense          | Q670*                | nd                  | 4     | No                                | CCDS7177.1                          |
| FR-CLL_5 | PABPC3              | 1        | 13 | 25671861  | 25671861  | G   | T  | 21 | 126 | 114 | Missense          | A509S                | neutral (0)         | 4     | No                                | CCDS9311.1                          |
| FR-CLL_5 | ROBO2               | 12       | 3  | 77614244  | 77614244  | C   | T  | 33 | 177 | 256 | Missense          | P608S                | deleterious (0.994) | 11    | No                                | CCDS43109.1                         |
| FR-CLL_5 | SLC5A8 <sup>#</sup> | 5        | 12 | 101587434 | 101587434 | C   | T  | 16 | 233 | 204 | Missense          | A221T                | neutral (0.009)     | 0     | No                                | CCDS9080.1                          |
| FR-CLL_5 | TP53                | 3        | 17 | 7579358   | 7579358   | C   | A  | 20 | 75  | 87  | Missense          | R110L                | deleterious (0.898) | 22245 | Yes                               | CCDS45605.1,CCDS45606.1,CCDS11118.1 |
| FR-CLL_6 | BRAF                | 15       | 7  | 140453145 | 140453145 | A   | T  | 28 | 60  | 151 | Missense          | L597Q                | deleterious (0.998) | 18290 | Yes                               | CCDS5863.1                          |
| FR-CLL_6 | CHAT                |          | 10 | 50870832  | 50870832  | C   | T  | 24 | 133 | 264 | Splice site       | nd                   | 3                   | No    | CCDS44389.1,CCDS7232.1,CCDS7233.1 |                                     |
| FR-CLL_6 | MCM2                | 2        | 3  | 127318291 | 127318291 | T   | -  | 28 | 136 | 179 | Frameshift del    | L46fs                | nd                  | 4     | No                                | CCDS3043.1                          |
| FR-CLL_6 | OSBPL8              | 10,8     | 12 | 76784414  | 76784414  | C   | T  | 28 | 116 | 204 | Missense          | R318Q,R276Q          | deleterious (0.54)  | 1     | No                                | CCDS31862.1,CCDS41814.1             |
| FR-CLL_6 | REV3L               | 13       | 6  | 111695585 | 111695585 | T   | C  | 26 | 131 | 190 | Missense          | N1325D               | neutral (0)         | 6     | No                                | CCDS5091.2                          |
| FR-CLL_6 | SLIT1               | 13       | 10 | 98816156  | 98816156  | G   | A  | 21 | 80  | 128 | Missense          | S408L                | neutral (0.303)     | 4     | No                                | CCDS7453.1                          |
| FR-CLL_6 | TSC1                | 16       | 9  | 135778080 | 135778080 | C   | T  | 24 | 165 | 327 | Missense          | R768H                | neutral (0.012)     | 14    | Yes                               | CCDS6956.1                          |
| FR-CLL_6 | VWF                 | 50       | 12 | 6059041   | 6059041   | G   | T  | 38 | 82  | 167 | Missense          | P2722T               | neutral (0.063)     | 12    | No                                | CCDS8539.1                          |
| FR-CLL_6 | ZMYM3               | 1        | X  | 70472487  | 70472487  | G   | A  | 71 | 14  | 24  | Nonsense          | Q207*                | nd                  | 1     | No                                | CCDS14409.1                         |
| FR-CLL_7 | ARMC2 <sup>#</sup>  | 13       | 6  | 109282844 | 109282844 | A   | T  | 10 | 189 | 202 | Missense          | Y662F                | neutral (0.001)     | 0     | No                                | CCDS5069.2                          |
| FR-CLL_7 | CCDC80              | 7        | 3  | 112324501 | 112324501 | G   | T  | 25 | 120 | 107 | Missense          | D872E                | deleterious (0.99)  | 2     | No                                | CCDS2968.1                          |
| FR-CLL_7 | COL12A1             | 23,38    | 6  | 75836148  | 75836148  | C   | T  | 29 | 126 | 134 | Missense          | E963K,E2127K         | deleterious (0.993) | 9     | No                                | CCDS43481.1,CCDS43482.1             |
| FR-CLL_7 | CRB1                | 6        | 1  | 197390996 | 197390996 | C   | A  | 32 | 184 | 165 | Missense          | P680T                | deleterious (0.999) | 9     | No                                | CCDS1390.1                          |
| FR-CLL_7 | EGR2                | 2,2      | 10 | 64573164  | 64573164  | C   | G  | 21 | 125 | 160 | Missense          | E362Q,E412Q          | deleterious (0.637) | 2     | No                                | CCDS44409.1,CCDS7267.1              |
| FR-CLL_7 | HMGCLL1             | 5,6      | 6  | 55378896  | 55378896  | T   | G  | 33 | 67  | 73  | Missense          | K164N,K194N          | neutral (0.004)     | 4     | No                                | CCDS43474.1,CCDS43475.1             |
| FR-CLL_7 | SAMHD1              | 6        | 20 | 35555625  | 35555625  | C   | -  | 54 | 109 | 134 | Frameshift del    | G219fs               | nd                  | 0     | No                                | CCDS13288.1                         |
| FR-CLL_7 | SF3B1               | 15       | 2  | 198266834 | 198266834 | T   | C  | 28 | 115 | 127 | Missense          | K700E                | deleterious (0.986) | 6     | No                                | CCDS33356.1                         |
| FR-CLL_7 | SLC23A2             | 8        | 20 | 4855316   | 4855316   | G   | C  | 24 | 148 | 145 | Missense          | S284C                | neutral (0.033)     | 2     | No                                | CCDS13085.1                         |
| FR-CLL_7 | TBC1D19             | 4        | 4  | 26622273  | 26622273  | A   | T  | 18 | 120 | 103 | Missense          | H86L                 | deleterious (0.988) | 1     | No                                | CCDS3439.1                          |
| FR-CLL_7 | TECP1               | 2        | 7  | 97874313  | 97874313  | C   | T  | 33 | 48  | 58  | Missense          | V98M                 | deleterious (0.88)  | 1     | No                                | CCDS47648.1                         |
| FR-CLL_8 | ACSS3               | 5        | 12 | 81537018  | 81537018  | T   | G  | 61 | 116 | 127 | Missense          | L305V                | neutral (0.06)      | 4     | No                                | CCDS9022.1                          |
| FR-CLL_8 | ANKRD50             | 3        | 4  | 125593540 | 125593540 | T   | G  | 55 | 85  | 68  | Missense          | K298Q                | deleterious (0.788) | 1     | No                                | CCDS34060.1                         |
| FR-CLL_8 | C4orf7              | 3        | 4  | 71099899  | 71099899  | A   | C  | 50 | 218 | 196 | Missense          | K85Q                 | neutral (0.36)      | 1     | No                                | CCDS3537.1                          |
| FR-CLL_8 | COL19A1             | 16       | 6  | 70831830  | 70831830  | A   | C  | 46 | 142 | 68  | Missense          | N446T                | deleterious (0.872) | 4     | No                                | CCDS4970.1                          |
| FR-CLL_8 | FAT1                | 13       | 4  | 187532909 | 187532909 | A   | G  | 38 | 110 | 90  | Missense          | Y3162H               | deleterious (0.997) | 12    | No                                | CCDS47177.1                         |
| FR-CLL_8 | GLYAT               | 4        | 11 | 58478159  | 58478159  | C   | T  | 49 | 138 | 200 | Missense          | R131H                | neutral (0.051)     | 0     | No                                | CCDS7971.1,CCDS7970.1               |
| FR-CLL_8 | HAS2                | 3        | 8  | 122626359 | 122626360 | AG  | CT | 38 | 150 | 233 | Missense          | L550T                | deleterious (0.877) | 15    | No                                | CCDS6335.1                          |
| FR-CLL_8 | HSP90AB1            | 2        | 6  | 44217294  | 44217294  | A   | G  | 44 | 354 | 583 | Missense          | T110A                | neutral (0.146)     | 4     | No                                | CCDS4909.1                          |
| FR-CLL_8 | JPH2                | 4        | 20 | 42744324  | 42744324  | G   | A  | 71 | 34  | 52  | Missense          | A664V                | neutral (0)         | 0     | No                                | CCDS13325.1                         |
| FR-CLL_8 | KCNE1L              | 1        | X  | 108868117 | 108868117 | G   | A  | 25 | 28  | 25  | Missense          | P45S                 | deleterious (0.979) | 0     | No                                | CCDS14547.1                         |
| FR-CLL_8 | KIAA1210            | 6        | X  | 118242320 | 118242320 | C   | A  | 22 | 279 | 296 | Missense          | A298S                | neutral (0.001)     | 5     | No                                | CCDS48156.1                         |

|           |          |     |    |           |           |   |   |    |     |     |                |               |                     |       |     |                                     |
|-----------|----------|-----|----|-----------|-----------|---|---|----|-----|-----|----------------|---------------|---------------------|-------|-----|-------------------------------------|
| FR-CLL_8  | OR51S1   | 1   | 11 | 4869505   | 4869505   | T | C | 21 | 201 | 301 | Missense       | N312D         | neutral (0.063)     | 4     | No  | CCDS31362.1                         |
| FR-CLL_8  | POTEE#   | 15  | 2  | 132021826 | 132021826 | G | A | 23 | 345 | 681 | Missense       | S933N         | neutral (0.475)     | 0     | No  | CCDS46414.1                         |
| FR-CLL_8  | RNLS     | 1   | 10 | 90342937  | 90342937  | A | T | 56 | 25  | 52  | Missense       | V4E           | deleterious (0.992) | 1     | No  | CCDS7388.1,CCDS31239.1              |
| FR-CLL_8  | SAMD9L   | 1   | 7  | 92761912  | 92761912  | G | C | 49 | 277 | 246 | Missense       | Q1125E        | deleterious (0.956) | 4     | No  | CCDS34681.1                         |
| FR-CLL_8  | SPTY2D1  | 6   | 11 | 18631423  | 18631423  | C | G | 41 | 159 | 164 | Missense       | K681N         | deleterious (0.907) | 1     | No  | CCDS31441.1                         |
| FR-CLL_8  | SRPX2    | 7   | X  | 99921802  | 99921802  | C | G | 44 | 72  | 76  | Missense       | T278S         | neutral (0)         | 2     | No  | CCDS14471.1                         |
| FR-CLL_8  | TRO      | 2   | X  | 54949591  | 54949591  | A | C | 40 | 81  | 89  | Missense       | K209T         | deleterious (0.964) | 1     | No  | CCDS43958.1,CCDS43959.1             |
| FR-CLL_8  | UTRN     | 9   | 6  | 144757083 | 144757083 | G | A | 23 | 70  | 79  | Missense       | E290K         | neutral (0.063)     | 5     | No  | CCDS34547.1                         |
| FR-CLL_9  | ACAT1    | 6   | 11 | 108009632 | 108009632 | T | C | 43 | 166 | 128 | Missense       | M148T         | deleterious (0.998) | 3     | No  | CCDS8339.1                          |
| FR-CLL_9  | ARSI     | 2   | 5  | 149677702 | 149677702 | T | C | 47 | 57  | 51  | Missense       | K262R         | neutral (0.068)     | 2     | No  | CCDS34275.1                         |
| FR-CLL_9  | ATM      | 11  | 11 | 108123639 | 108123639 | G | - | 40 | 48  | 45  | Frameshift del | C633fs        | nd                  | 240   | Yes | CCDS31669.1                         |
| FR-CLL_9  | DSC2     | 13  | 18 | 28651777  | 28651777  | T | A | 39 | 124 | 104 | Missense       | D640V         | neutral (0.015)     | 3     | No  | CCDS11892.1,CCDS11893.1             |
| FR-CLL_9  | MED12    | 2   | X  | 70339253  | 70339253  | G | A | 92 | 73  | 61  | Missense       | G44S          | deleterious (0.98)  | 4     | No  | CCDS43970.1                         |
| FR-CLL_9  | MGST2    | 4   | 4  | 140624672 | 140624672 | C | T | 63 | 150 | 89  | Missense       | S98L          | neutral (0.157)     | 1     | No  | CCDS3749.1                          |
| FR-CLL_9  | MMP16    | 8   | 8  | 89068458  | 89068458  | G | A | 49 | 176 | 127 | Missense       | P424L         | deleterious (1)     | 8     | No  | CCDS6246.1                          |
| FR-CLL_9  | OR56B4   | 1   | 11 | 6129824   | 6129824   | G | T | 49 | 171 | 183 | Missense       | K272N         | neutral (0.418)     | 1     | No  | CCDS31406.1                         |
| FR-CLL_9  | PDCD5    | 2   | 19 | 33073122  | 33073122  | C | T | 41 | 70  | 52  | Nonsense       | Q30*          | nd                  | 2     | No  | CCDS12423.1                         |
| FR-CLL_9  | PRM2     | 1   | 16 | 11370049  | 11370049  | C | T | 52 | 96  | 90  | Missense       | R60Q          | neutral (0.003)     | 0     | No  | CCDS42118.1                         |
| FR-CLL_9  | ROS1     | 33  | 6  | 117647498 | 117647498 | T | A | 38 | 117 | 78  | Missense       | T1816S        | deleterious (0.799) | 25    | Yes | CCDS5116.1                          |
| FR-CLL_9  | SVEP1    | 25  | 9  | 113209237 | 113209237 | A | C | 45 | 110 | 90  | Missense       | L1402V        | deleterious (0.899) | 7     | No  | CCDS48004.1                         |
| FR-CLL_9  | TMEM132B | 9   | 12 | 126138750 | 126138750 | G | T | 61 | 253 | 168 | Missense       | A911S         | deleterious (0.813) | 19    | No  | CCDS41859.1                         |
| FR-CLL_9  | TRPC5    | 2   | X  | 111155820 | 111155820 | T | C | 85 | 115 | 130 | Missense       | Y200C         | deleterious (1)     | 1     | No  | CCDS14561.1                         |
| FR-CLL_9  | TRPC5    | 2   | X  | 111155830 | 111155830 | G | C | 85 | 108 | 125 | Missense       | L197V         | deleterious (0.967) | 1     | No  | CCDS14561.1                         |
| FR-CLL_9  | UBR5     | 45  | 8  | 103289248 | 103289248 | G | A | 49 | 185 | 160 | Missense       | A2154V        | neutral (0.002)     | 28    | No  | CCDS34933.1                         |
| FR-CLL_9  | UTRN     | 14  | 6  | 144768390 | 144768390 | A | G | 40 | 75  | 50  | Missense       | N553S         | neutral (0)         | 5     | No  | CCDS34547.1                         |
| FR-CLL_10 | ALK      | 29  | 2  | 29416604  | 29416604  | C | G | 28 | 126 | 123 | Missense       | G1450A        | neutral (0)         | 1218  | Yes | CCDS33172.1                         |
| FR-CLL_10 | CPXCR1   | 1   | X  | 88008943  | 88008943  | A | T | 48 | 58  | 49  | Missense       | K176N         | neutral (0.001)     | 3     | No  | CCDS14458.1                         |
| FR-CLL_10 | FAM47A   | 1   | X  | 34149725  | 34149725  | C | G | 40 | 57  | 43  | Missense       | R224P         | deleterious (0.995) | 5     | No  | CCDS43926.1                         |
| FR-CLL_10 | GALNT10  | 4   | 5  | 153709223 | 153709223 | G | A | 47 | 159 | 172 | Missense       | V165I         | neutral (0.032)     | 2     | No  | CCDS4325.1                          |
| FR-CLL_10 | HMCN1    | 81  | 1  | 186092259 | 186092259 | G | T | 39 | 74  | 64  | Missense       | A4136S        | deleterious (0.625) | 23    | No  | CCDS30956.1                         |
| FR-CLL_10 | INVS     | 7   | 9  | 103009037 | 103009037 | A | G | 23 | 236 | 167 | Missense       | D349G         | deleterious (0.992) | 2     | No  | CCDS6746.1,CCDS6747.1               |
| FR-CLL_10 | KIAA1967 | 11  | 8  | 22473091  | 22473091  | A | - | 41 | 92  | 71  | Frameshift del | P453fs        | nd                  | 3     | No  | CCDS34863.1                         |
| FR-CLL_10 | LRRC49   | 5   | 15 | 71197094  | 71197094  | G | C | 39 | 192 | 138 | Missense       | R167T         | deleterious (0.995) | 1     | No  | CCDS32282.1                         |
| FR-CLL_10 | MCART2   | 1   | 18 | 29340297  | 29340297  | G | A | 41 | 446 | 315 | Missense       | R110W         | neutral (0.144)     | 1     | No  | CCDS32812.1                         |
| FR-CLL_10 | MGEA5    | 8,9 | 10 | 103559161 | 103559161 | G | - | 47 | 249 | 173 | Frameshift del | P363fs,P416fs | nd                  | 3     | No  | CCDS44471.1,CCDS7520.1              |
| FR-CLL_10 | NTRK3    | 8   | 15 | 88678619  | 88678619  | C | T | 52 | 54  | 63  | Missense       | R306H         | deleterious (0.961) | 281   | Yes | CCDS10340.1,CCDS32322.1,CCDS32323.1 |
| FR-CLL_10 | NUDCD3   | 2   | 7  | 44524646  | 44524646  | G | A | 45 | 114 | 75  | Missense       | H144Y         | neutral (0.157)     | 0     | No  | CCDS5490.2                          |
| FR-CLL_10 | RPE65    | 5   | 1  | 68910251  | 68910251  | G | A | 47 | 200 | 167 | Missense       | T153I         | deleterious (1)     | 1     | No  | CCDS643.1                           |
| FR-CLL_10 | RPS15    | 4   | 19 | 1440414   | 1440414   | C | T | 37 | 43  | 43  | Missense       | P131S         | deleterious (0.822) | 0     | No  | CCDS12067.1                         |
| FR-CLL_10 | SAMD4A   | 2   | 14 | 55168817  | 55168817  | A | C | 45 | 181 | 132 | Missense       | K77N          | deleterious (0.873) | 0     | No  | CCDS32084.1                         |
| FR-CLL_10 | SGOL2    |     | 2  | 201434616 | 201434616 | G | A | 21 | 293 | 184 | Splice site    |               | nd                  | 4     | No  | CCDS42796.1                         |
| FR-CLL_10 | SIPA1L2  | 19  | 1  | 232539242 | 232539242 | G | T | 56 | 82  | 56  | Missense       | P1631H        | deleterious (0.587) | 6     | No  | CCDS41474.1                         |
| FR-CLL_10 | SULT1C4# | 7   | 2  | 109003830 | 109003830 | A | T | 25 | 150 | 117 | Missense       | D284V         | deleterious (0.958) | 0     | No  | CCDS2077.1                          |
| FR-CLL_10 | TP53     | 6   | 17 | 7577569   | 7577569   | A | T | 87 | 23  | 39  | Missense       | C238S         | deleterious (1)     | 22245 | Yes | CCDS45605.1,CCDS45606.1,CCDS11118.1 |
| FR-CLL_10 | ZNF114   | 3   | 19 | 48790127  | 48790127  | T | A | 51 | 102 | 108 | Missense       | C416S         | deleterious (0.814) | 0     | No  | CCDS12713.1                         |

#Gene affected by a subclonal mutation

\*Cancer Gene Census database (<http://www.sanger.ac.uk/genetics/CGP/Census>)

^In CCDS Reference Sequence

^^Numbering according to the Human Genome hg19 assembly

Abbreviations: Ref nt, reference nucleotide; Var nt, variant nucleotide; AA, amino acid; fs, frameshift; D, deletion; nd, not determined (The PolyPhen-2 algorithm predicts only the impact of amino acid substitutions)

**Table S5. Enriched functional categories and pathways in FR-CLL altered genes (DAVID analysis)**

|               | Cluster | Category                                                          | Genes                                                                                                                                                                                                                                                                                                                         | Enrichment score | PValue   | Benjamini |
|---------------|---------|-------------------------------------------------------------------|-------------------------------------------------------------------------------------------------------------------------------------------------------------------------------------------------------------------------------------------------------------------------------------------------------------------------------|------------------|----------|-----------|
| GO categories | 1       | cell adhesion                                                     | NRP1, SVEP1, PTPRU, PNN, LAMA2, VWF, GP5, COL19A1, TSC1, FAT1, TRO, FBLN5, DSC2, COL12A1, COL6A1, ROBO2, OMG, MUC5B, NPHP1                                                                                                                                                                                                    | 3.8346           | 1.13E-05 | 0.0119    |
|               | 2       | plasma membrane part                                              | KCNE1L, SORL1, UTRN, AMOTL1, ABCA4, ATP12A, PNN, GP5, ANK1, SLC23A2, FAT1, TRO, CEACAM5, ROBO2, ROS1, SAMD4A, NPHP1, MPDZ, TRPC5, MMP16, PTPRU, ALK, NTRK3, VWF, CCR7, ABCC9, PDGFRA, DSC2, DSP, HAS2                                                                                                                         | 2.0379           | 0.0069   | 0.2704    |
|               | 3       | extracellular matrix                                              | LAMA2, VWF, HMCN1, COL19A1, FBLN5, CCDC80, COL6A1, COL12A1, MMP16, ADAMTS12                                                                                                                                                                                                                                                   | 2.0324           | 0.0014   | 0.2793    |
|               | 4       | cell-cell junction                                                | MPDZ, DSP, DSC2, AMOTL1, PNN                                                                                                                                                                                                                                                                                                  | 1.5844           | 0.0095   | 0.2665    |
|               | 5       | extracellular structure organization/skeletal muscle organization | COL19A1, TSC1, FBLN5, UTRN, CCDC80, PDGFRA, COL12A1, CHAT                                                                                                                                                                                                                                                                     | 1.3683           | 3.45E-04 | 0.1145    |
|               | 6       | regulation of cell morphogenesis/nervous system development       | NTRK3, NRP1, CNTF, ROBO2, OMG                                                                                                                                                                                                                                                                                                 | 1.3024           | 0.0011   | 0.2591    |
|               | 7       | regulation of membrane potential                                  | CNTF, EGR2, TSC1, HEXA, MGEA5                                                                                                                                                                                                                                                                                                 | 1.2982           | 0.0230   | 0.6907    |
|               | 8       | protein tyrosine kinase activity                                  | NTRK3, NRP1, PDGFRA, ALK, ROS1                                                                                                                                                                                                                                                                                                | 1.2694           | 0.0023   | 0.4831    |
|               | 9       | wound healing                                                     | VWF, GP5, HMCN1, FBLN5, PDGFRA, DSP                                                                                                                                                                                                                                                                                           | 1.2377           | 0.0191   | 0.7671    |
|               | 10      | insoluble fraction                                                | JPH2, MPDZ, UTRN, TP53, ABCA4, ABCC9, TSC1, SLC23A2, BACE2, CYP8B1, ROS1, SAMD4A, MGST2                                                                                                                                                                                                                                       | 1.2051           | 0.0476   | 0.5733    |
|               | 11      | ion homeostasis                                                   | CCR7, CNTF, JPH2, EGR2, TSC1, SLC9A4, HEXA, MGEA5, TP53, ATP12A                                                                                                                                                                                                                                                               | 1.1944           | 0.0057   | 0.5813    |
|               | 12      | plasma membrane                                                   | KCNE1L, JPH2, NRP1, SLC9A4, SORL1, UTRN, CSMD3, RPE65, AMOTL1, ABCA4, ATP12A, PNN, OR56B4, GP5, SLCO1A2, ANK1, CRB1, SLC23A2, TRO, FAT1, COL6A1, CEACAM5, ROBO2, ROS1, SAMD4A, NPHP1, BRAF, GFRAL, MPDZ, TRPC5, MMP16, PTPRU, ALK, NTRK3, LAMA2, VWF, ABCC9, CCR7, OR51S1, PDGFRA, SLC5A8, DSC2, TNNI3K, DSP, HAS2, OMG, FPGT | 1.1369           | 0.0038   | 0.1950    |
|               | 13      | protein heterodimerization activity                               | IKZF3, BRAF, HEXA, PDGFRA, TP53, ROBO2                                                                                                                                                                                                                                                                                        | 0.9078           | 0.0298   | 0.5415    |
|               | 14      | metal ion transport                                               | ABCC9, JPH2, TSC1, TRPC5, SLC23A2, SLC9A4, SLC5A8, SLC25A37, ATP12A                                                                                                                                                                                                                                                           | 0.8911           | 0.0341   | 0.7303    |
|               | 15      | chaperone binding                                                 | VWF, TSC1, TP53                                                                                                                                                                                                                                                                                                               | 0.7181           | 0.0155   | 0.5221    |
|               | 16      | protein N-terminus binding                                        | VWF, TSC1, TP53, ATM                                                                                                                                                                                                                                                                                                          | 0.5839           | 0.0237   | 0.5307    |
| KEGG pathways |         | Pathways in cancer                                                | HSP90AB1, LAMA2, BRAF, PDGFRA, TP53                                                                                                                                                                                                                                                                                           | 0.8070           | 0.0434   | 0.9815    |
|               |         | Focal adhesion                                                    | LAMA2, VWF, BRAF, PDGFRA, COL6A1                                                                                                                                                                                                                                                                                              | 0.7970           | 0.1005   | 0.9077    |

**Table S6. CNAs detected in the Discovery panel by SNP 6.0 arrays. Genes in CNAs encompassing  $\leq 10$  CCDS genes are also listed**

| Sample ID | Chrom | Cytoband      | Start^    | End^      | Number of markers | CN value    | Segment size (kb) | Aberration             | Number of CCDS genes | CCDS genes                                                        | Number of RefSeq | RefSeq genes                                                                      |
|-----------|-------|---------------|-----------|-----------|-------------------|-------------|-------------------|------------------------|----------------------|-------------------------------------------------------------------|------------------|-----------------------------------------------------------------------------------|
| FR-CLL_1  | 11    | q22.3         | 107527048 | 107929706 | 183               | 1.48        | 402.658           | loss focal             | 5                    | ATM,C11orf65,EXPH5,KDELC2,NPAT                                    | 5                | ATM,C11orf65,EXPH5,KDELC2,NPAT                                                    |
| FR-CLL_1  | 13    | q14.11        | 40388583  | 41808882  | 904               | 1.51        | 1420.299          | loss focal             | 10                   | AKAP11,C13orf15,DGKH,ELF1,KBTBD6,KBTBD7,KIAA0564,MTRF1,NAA16,WBP4 | 12               | AKAP11,C13orf15,DGKH,ELF1,KBTBD6,KBTBD7,KIAA0564,MTRF1,NAA16,OR7E37P,SUGT1P3,WBP4 |
| FR-CLL_1  | 13    | q14.12-q14.3  | 44783591  | 50681315  | 3882              | 1.50        | 5897.724          | loss                   | 33                   |                                                                   | 46               |                                                                                   |
| FR-CLL_2  | 13    | q14.12-q14.3  | 45700118  | 50495220  | 3151              | 1.56        | 4795.102          | loss                   | 25                   |                                                                   | 34               |                                                                                   |
| FR-CLL_4  | 13    | q14.3         | 49482488  | 49862328  | 218               | 0.87        | 379.84            | loss focal             | 2                    | KCNRG,TRIM13                                                      | 7                | DLEU1,DLEU2,KCNRG,MIR15A, MIR16, ST13P4,TRIM13                                    |
| FR-CLL_4  | 13    | q32.3         | 98646972  | 98879985  | 149               | 0.89        | 233.013           | loss focal             | 1                    | UBAC2                                                             | 6                | FKSG29,GPR18,GPR183, LOC100289373,MIR623, UBAC2                                   |
| FR-CLL_4  | 17    | p11.1-q11.1   | 514       | 22294526  | 13259             | 1.00        | 22294.012         | loss                   | 276                  |                                                                   | 384              |                                                                                   |
| FR-CLL_4  | 18    | p11.21-p11.32 | 1543      | 15392396  | 10589             | 0.99        | 15390.853         | loss                   | 54                   |                                                                   | 79               |                                                                                   |
| FR-CLL_4  | 21    | q22.11        | 33204749  | 33216192  | 14                | 0.73        | 11.443            | loss                   | 0                    |                                                                   | 0                |                                                                                   |
| FR-CLL_5  | 3     | p12.3-p14.1   | 70103185  | 81779987  | 7427              | 1.62        | 11676.802         | loss focal             | 9                    | CNTN3,EIF4E3,FOXP1,GPR27,PDZRN3,PPP4R2,PROK2,ROBO2,SHQ1           | 21               |                                                                                   |
| FR-CLL_5  | 13    | q14.2-q14.3   | 47841512  | 49515159  | 991               | 1.642621402 | 1673.647          |                        | 17                   |                                                                   | 19               |                                                                                   |
| FR-CLL_5  | 13    | q14.3         | 49516995  | 50200311  | 439               | 1.08        | 683.316           | loss focal             | 0                    |                                                                   | 6                | DLEU1,DLEU2,DLEU7,MIR15A,MIR16,ST13P4                                             |
| FR-CLL_5  | 13    | q14.3         | 50201343  | 50422445  | 161               | 1.57123612  | 221.102           |                        | 1                    | RNASEH2B                                                          | 2                | DLEU7,RNASEH2B                                                                    |
| FR-CLL_5  | 17    | p11.2-p13.3   | 514       | 22069633  | 13221             | 1.54        | 22069.119         | loss                   | 276                  |                                                                   | 384              |                                                                                   |
| FR-CLL_6  | 2     | p23.3         | 24475782  | 26137612  | 808               | 1.33        | 1661.83           | loss focal             | 9                    |                                                                   | 14               | ADCY3,CENPO,DNAJC27,DNMT3A,KIF3C,NCOA1, POMC,PTRHD1,RAB10                         |
| FR-CLL_6  | 2     | p23.2-p23.3   | 26545820  | 27905293  | 625               | 1.35        | 1359.473          | loss                   | 43                   |                                                                   | 45               |                                                                                   |
| FR-CLL_6  | 2     | q31.1         | 171495172 | 172086291 | 324               | 1.40        | 591.119           | loss                   | 4                    | DCAF17,GORASP2,METTL8,TLK1                                        | 4                | DCAF17,GORASP2,METTL8,TLK1                                                        |
| FR-CLL_6  | 2     | q36.3-q37.1   | 230668575 | 231112634 | 273               | 1.36        | 444.059           | loss focal             | 3                    | SP100,SP110,SP140                                                 | 4                | SP100,SP110,SP140,SP140L                                                          |
| FR-CLL_6  | 2     | q37.1         | 232258404 | 234045405 | 1023              | 1.51        | 1787.001          | loss                   | 21                   |                                                                   | 31               |                                                                                   |
| FR-CLL_6  | 3     | p24.2-p26.3   | 1121645   | 26253855  | 19168             | 1.52        | 25132.21          | loss                   | 99                   |                                                                   | 136              |                                                                                   |
| FR-CLL_6  | 3     | p12.3-p21.31  | 45516933  | 76285834  | 20948             | 1.40        | 30768.901         | loss                   | 208                  |                                                                   | 277              |                                                                                   |
| FR-CLL_6  | 3     | q27.2-q29     | 186225109 | 199380503 | 8681              | 1.46        | 13155.394         | loss                   | 85                   |                                                                   | 119              |                                                                                   |
| FR-CLL_6  | 6     | p11.2-p21.1   | 41967125  | 57448332  | 9748              | 1.52        | 15481.207         | loss                   | 117                  |                                                                   | 138              |                                                                                   |
| FR-CLL_6  | 17    | p11.1-p13.3   | 74399     | 22159777  | 13221             | 1.26        | 22085.378         | loss                   | 276                  |                                                                   | 384              |                                                                                   |
| FR-CLL_6  | 17    | q21.33-q22    | 47190109  | 52149620  | 3639              | 2.64        | 4959.511          | gain                   | 11                   |                                                                   | 11               |                                                                                   |
| FR-CLL_8  | 4     | q35.2         | 189466210 | 189487325 | 33                | 0.93        | 21.115            | loss                   | 0                    |                                                                   | 0                |                                                                                   |
| FR-CLL_8  | 12    | p11.1-q24.33  | 20691     | 132288250 | 85902             | 3.70        | 132267.559        | gain                   | 882                  |                                                                   | 1127             |                                                                                   |
| FR-CLL_9  | 4     | p14-p16.3     | 56707     | 38715653  | 26054             | 1.01        | 38658.946         | loss (whole short arm) | 128                  |                                                                   | 193              |                                                                                   |
| FR-CLL_9  | 4     | p11-q35.2     | 38720286  | 191210542 | 92423             | 2.99        | 152490.256        | gain (whole long arm)  | 491                  |                                                                   | 637              |                                                                                   |
| FR-CLL_9  | 6     | q13           | 74045884  | 74461064  | 198               | 1.15        | 415.18            | loss focal             | 7                    | C6orf221,DDX43,DPPA5,EEF1A1,MB21D1,MTO1, SLC17A5                  | 9                | C6orf147,C6orf221,DDX43,DPPA5, EEF1A1,MB21D1,MTO1,OOEP, SLC17A5                   |
| FR-CLL_9  | 12    | p11.1-q24.33  | 20691     | 132288250 | 85907             | 3.02        | 132267.559        | gain                   | 882                  |                                                                   | 1127             |                                                                                   |
| FR-CLL_9  | 15    | q11.2-q12     | 19123066  | 23766243  | 2405              | 2.97        | 4643.177          | gain                   | 14                   |                                                                   | 117              |                                                                                   |
| FR-CLL_9  | 15    | q12-q15.1     | 23768183  | 38629477  | 9636              | 1.11        | 14861.294         | loss                   | 53                   |                                                                   | 85               |                                                                                   |
| FR-CLL_9  | 15    | q15.1         | 38639047  | 39793744  | 502               | 3.63        | 1154.697          | gain                   | 23                   |                                                                   | 28               |                                                                                   |
| FR-CLL_9  | 15    | q15.1         | 39798024  | 40175398  | 231               | 1.35        | 377.374           | loss focal             | 4                    | EHD4,JMJD7-PLA2G4B,MAPKB1,PLA2G4D                                 | 11               |                                                                                   |
| FR-CLL_9  | 17    | p11.2-p13.3   | 514       | 17820020  | 11375             | 1.07        | 17819.506         | loss                   | 238                  |                                                                   | 324              |                                                                                   |
| FR-CLL_10 | 6     | p25.2-p25.3   | 94649     | 3844660   | 3135              | 3.20        | 3750.011          | gain                   | 22                   |                                                                   | 191              |                                                                                   |
| FR-CLL_10 | 7     | q31.1-q31.33  | 112128770 | 125548872 | 8011              | 1.36        | 13420.102         | loss                   | 39                   |                                                                   | 52               |                                                                                   |
| FR-CLL_10 | 7     | q32.3-q34     | 130873717 | 139995719 | 6083              | 1.48        | 9122.002          | loss                   | 41                   |                                                                   | 52               |                                                                                   |
| FR-CLL_10 | 7     | q36.3         | 158358509 | 158810195 | 312               | 1.30        | 451.686           | loss focal             | 1                    | VIPR2                                                             | 3                | LOC154822,VIPR2,WDR60                                                             |
| FR-CLL_10 | 15    | q11.1-q11.2   | 18276329  | 21609880  | 1103              | 1.48        | 3333.551          | loss focal             | 9                    | CYFIP1,MKRN3,NDN,NIPA1,NIPA2,OR4M2,OR4N4,POTEB,TUBGCP5            | 27               |                                                                                   |
| FR-CLL_10 | 17    | p11.2-p13.3   | 514       | 18863446  | 11815             | 1.09        | 18862.932         | loss                   | 256                  |                                                                   | 350              |                                                                                   |

^Numbering according to the Human Genome hg18 assembly

Note: segments highlighted in grey represent subclonal lesions. These segments were not computed in the calculation of the total load of genetic lesions presented in Figure 1

**Table S7. Clinico-biological characteristics of patients displaying an outlier number of CNAs.**

| Sample ID   | Timing of refractoriness | Gender | Age at refractoriness | IGHV status | FISH                        | Mutations detected | Evolution to Richter syndrome | Chromosomes with multiple CN switches |
|-------------|--------------------------|--------|-----------------------|-------------|-----------------------------|--------------------|-------------------------------|---------------------------------------|
| FR-CLL_7228 | Primary                  | F      | 83                    | UM          | Normal                      | <i>SF3B1</i>       | No                            | 6                                     |
| FR-CLL_4845 | Primary                  | M      | 77                    | UM          | del17p13, del13q14          | <i>TP53, SF3B1</i> | No                            | 8, 13                                 |
| FR-CLL_6012 | Primary                  | M      | 82                    | M           | del17p13, del13q14          | <i>TP53, FAT1</i>  | No                            | 8, 9                                  |
| FR-CLL_4380 | Acquired                 | F      | 76                    | UM          | del17p13, +12               | <i>FAT1</i>        | No                            | 3, 12                                 |
| FR-CLL_9311 | Acquired                 | F      | 84                    | UM          | del17p13                    | <i>TP53</i>        | No                            | 14                                    |
| FR-CLL_9244 | Acquired                 | M      | 69                    | M           | del11q22-q23, +12, del13q14 | -                  | No                            | 3                                     |

**Table S8. Frequency and description of MCRs generated by the chromotripsis phenomenon.** CNs occurring in  $\geq 2$  samples are included. Genes in MCRs encompassing  $\leq 10$  genes are also listed.

| Cytoband        | Type of CNA | N° of patients (%) | MCR size | Genes in MCR                                                                            |
|-----------------|-------------|--------------------|----------|-----------------------------------------------------------------------------------------|
| 14q31.3         | Loss        | 4 (10.2)           | 1.2 Mb   | 7 ( <i>GALC,GPR65,KCNK10,SPATA7,PTPN21,ZC3H14,TTC8</i> )                                |
| 14q32.11-q32.12 | Loss        | 4 (10.2)           | 1.5 Mb   | 10 ( <i>C14orf143,TDP1,KCNK13,PSMC1,C14orf102,CALM1,TTC7B,RPS6KA5,C14orf159,GPR68</i> ) |
| 14q32.13-q32.2  | Loss        | 4 (10.2)           | 1.1 Mb   | 9 ( <i>CLMN,C14orf49,GLRX5,TCL6,TCL1B,TCL1A,BDKRB2,BDKRB1,ATG2B</i> )                   |
| 8p23.3-p23.1    | Loss        | 3 (7.6)            | 6.1 Mb   | 13                                                                                      |
| 8p23.1          | Loss        | 3 (7.6)            | 647 kb   | 9 ( <i>FAM167A,BLK,GATA4,NEIL2,FDFT1,CTSB,DEFB137,DEFB136,DEFB134</i> )                 |
| 8p12            | Loss        | 3 (7.6)            | 2 Mb     | 6 ( <i>NRG1,FUT10,MAK16,C8orf41,RNF122,DUSP26</i> )                                     |
| 14q24.3         | Loss        | 3 (7.6)            | 1.1 Mb   | 22                                                                                      |
| 6p21.1-p12.3    | Loss        | 2 (5.1)            | 1.3 Mb   | 11 (including <i>NFKBIE</i> and <i>RUNX2</i> )                                          |
| 6p12.3          | Loss        | 2 (5.1)            | 3.2 Mb   | 14                                                                                      |
| 6p12.3          | Loss        | 2 (5.1)            | 619 kb   | 7 ( <i>PGK2,CRISP1,DEFB114,DEFB113,DEFB110,DEFB111,DEFB112</i> )                        |
| 8p21.1          | Loss        | 2 (5.1)            | 205 Kb   | 2 ( <i>FBXO16,FZD3</i> )                                                                |
| 8p21.1          | Loss        | 2 (5.1)            | 76 kb    | 2 ( <i>EXTL3,INTS9</i> )                                                                |
| 8p12            | Loss        | 2 (5.1)            | 3.9 Mb   | 17 (including <i>FGFR1</i> )                                                            |

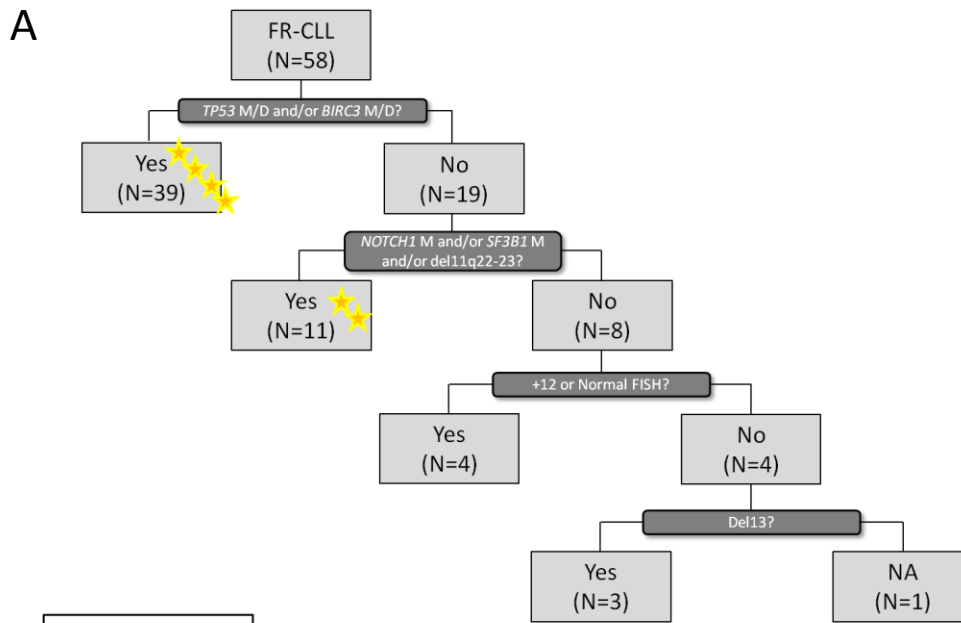

★ = *FAT1* mutated case

**B**

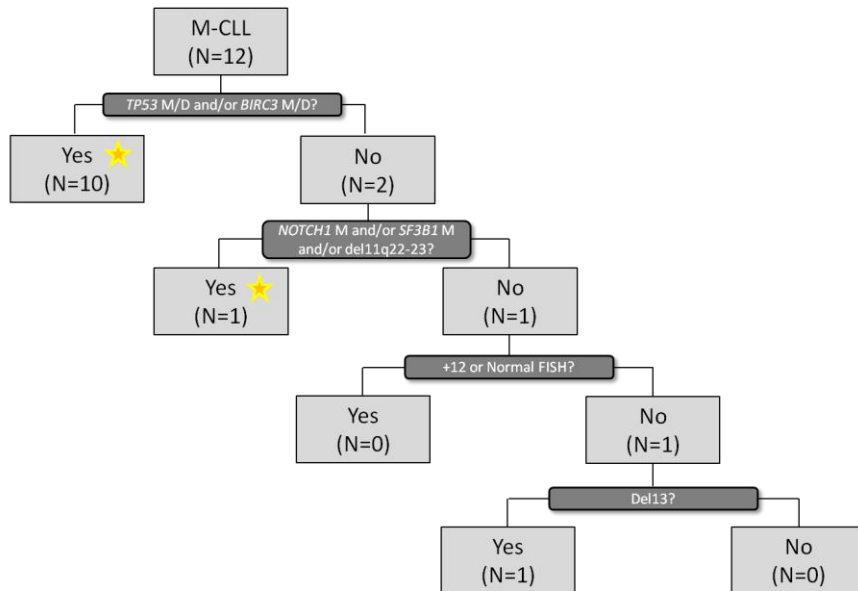

**C**

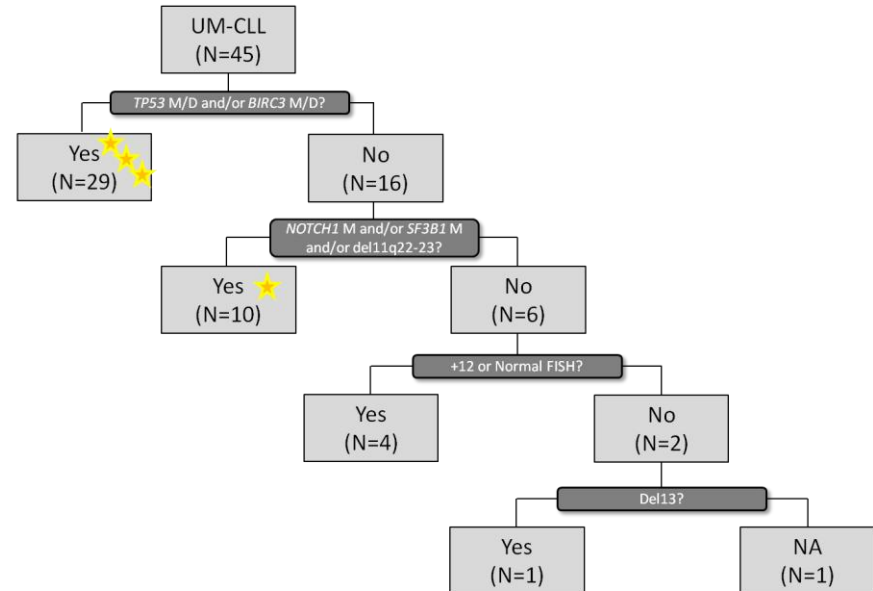

**Figure S1.** CONSORT diagram of all FR-CLL patients (A), of *IGHV*-M (B) and of *IGHV*-UM cases (C), according the integrated mutational and cytogenetic hierarchical approach proposed by Rossi D. (*Blood* 2013).

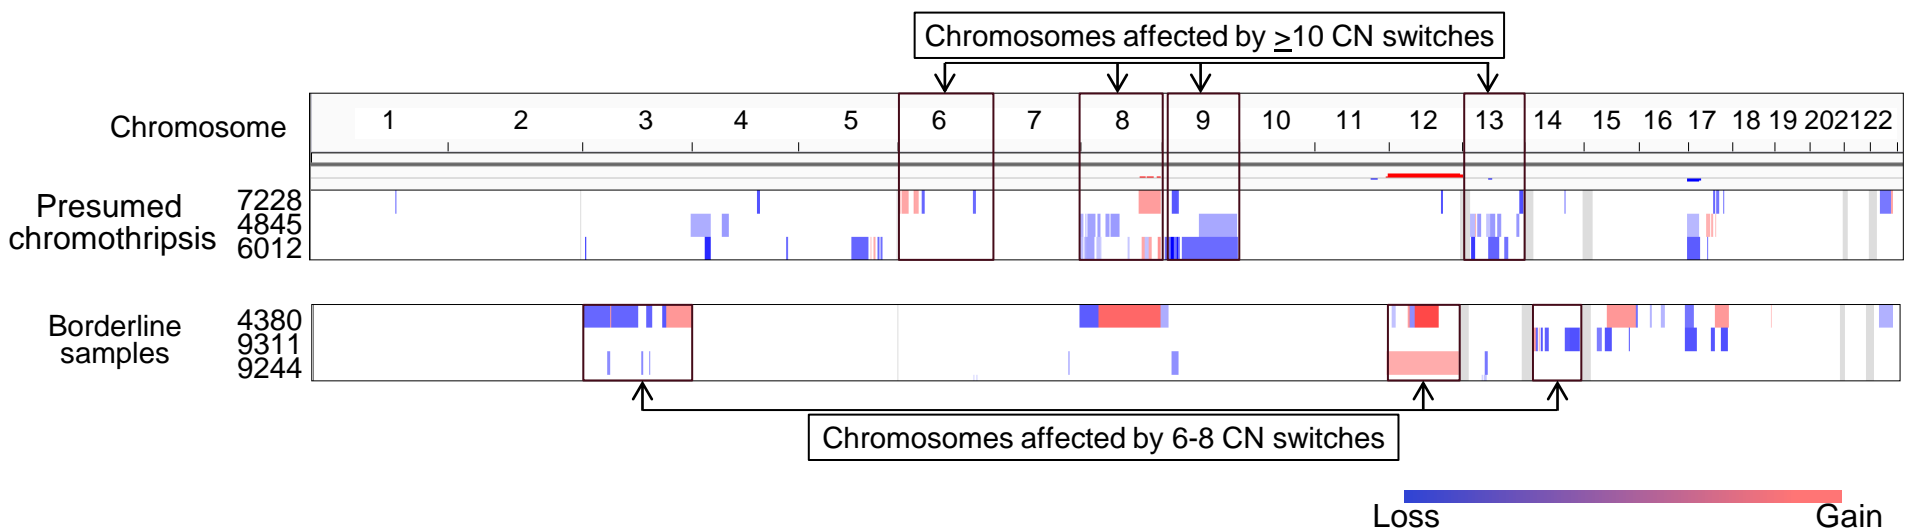

**Figure S2.** Curated segmented Copy number data of samples presumed to be affected by chromothripsis. The chromosomes involved are also indicated. Losses are depicted in blue and Gains in red. CN: Copy number.
